# Supplementary material for: Distribution Pattern of Mangrove Fish Communities in China
Source: MDPI journal article supplement (doi:10.3390/biology11121696), 2022-11-24
Supplement: s1 [file s1]

Table S1: The checklist of mangrove fishes in China.

| No. | Class, Order, Family, Genus, Species | IUCN | Feeding habits | Habitat            |
|-----|--------------------------------------|------|----------------|--------------------|
|     | Chondrichthyes                       |      |                |                    |
|     | Carcharhiniiformes                   |      |                |                    |
|     | Carcharhinidae                       |      |                |                    |
|     | Carcharhinus                         |      |                |                    |
| 1   | Carcharhinus hemiodon                | CR   | Carnivore      | MAR; BRA; DEM      |
| 2   | Carcharhinus sorrah                  | NT   | Carnivore      | MAR; BRA; RFA      |
|     | Rhizoprionodon                       |      |                |                    |
| 3   | Rhizoprionodon acutus                | VU   | Carnivore      | MAR; FRE; BRA; BEP |
|     | Myliobatiformes                      |      |                |                    |
|     | Dasyatidae                           |      |                |                    |
|     | Hemitrygon                           |      |                |                    |
| 4   | Hemitrygon akajei                    | NT   | Carnivore      | MAR; RFA           |
| 5   | Hemitrygon bennettii                 | NE   | Carnivore      | MAR; DEM           |
| 6   | Hemitrygon laevigata                 | VU   | Omnivore       | MAR; DEM           |
|     | Himantura                            |      |                |                    |
| 7   | Himantura microphthalma              | NE   | Omnivore       | MAR; DEM           |
|     | Telatrygon                           |      |                |                    |
| 8   | Telatrygon zugei                     | NT   | Carnivore      | MAR; BRA; DEM      |
|     | Gymnuridae                           |      |                |                    |
|     | Gymnura                              |      |                |                    |
| 9   | Gymnura bimaculata                   | NE   | Omnivore       | MAR; DEM           |
|     | Myliobatidae                         |      |                |                    |
|     | Myliobatis                           |      |                |                    |
| 10  | Myliobatis tobijei                   | VU   | Carnivore      | MAR; DEM           |
|     | Platyrrhinidae                       |      |                |                    |
|     | Platyrrhina                          |      |                |                    |
| 11  | Platyrrhina sinensis                 | EN   | Carnivore      | MAR; DEM           |
|     | Orectolobiformes                     |      |                |                    |
|     | Hemiscylliidae                       |      |                |                    |
|     | Chiloscyllium                        |      |                |                    |
| 12  | Chiloscyllium plagiosum              | NT   | Herbivore      | MAR; RFA           |
|     | Rajiformes                           |      |                |                    |
|     | Rajidae                              |      |                |                    |
|     | Okamejei                             |      |                |                    |
| 13  | Okamejei hollandi                    | VU   | Carnivore      | MAR; DEM           |
|     | Torpediniiformes                     |      |                |                    |
|     | Narkidae                             |      |                |                    |
|     | Narke                                |      |                |                    |
| 14  | Narke japonica                       | VU   | Carnivore      | MAR; RFA           |
|     | Osteichthyes                         |      |                |                    |
|     | Anguilliformes                       |      |                |                    |
|     | Anguillidae                          |      |                |                    |
|     | Anguilla                             |      |                |                    |
| 15  | Anguilla japonica                    | EN   | Carnivore      | MAR; FRE; BRA; DEM |

Supplementary Material

| No. | Class, Order, Family, Genus, Species | IUCN | Feeding habits | Habitat                 |
|-----|--------------------------------------|------|----------------|-------------------------|
|     | Congridae                            |      |                |                         |
|     | Ariosoma                             |      |                |                         |
| 16  | Ariosoma anago                       | DD   | Carnivore      | MAR; DEM                |
|     | Uroconger                            |      |                |                         |
| 17  | Uroconger lepturus                   | LC   | Carnivore      | MAR; DEM                |
|     | Muraenesocidae                       |      |                |                         |
|     | Congresox                            |      |                |                         |
| 18  | Congresox talabon                    | NE   | Carnivore      | MAR; BRA; DEM; AMP      |
|     | Muraenesox                           |      |                |                         |
| 19  | Muraenesox bagio                     | NE   | Carnivore      | MAR; BRA; DEM; OD       |
| 20  | Muraenesox cinereus                  | LC   | Carnivore      | MAR; FRE; BRA; DEM; OD  |
| 21  | Muraenesox yamaguchiensis            | NE   | Omnivore       | MAR; BEP                |
|     | Muraenidae                           |      |                |                         |
|     | Anarchias                            |      |                |                         |
| 22  | Anarchias allardicei                 | LC   | Omnivore       | MAR; DEM                |
|     | Gymnothorax                          |      |                |                         |
| 23  | Gymnothorax isingteena               | LC   | Omnivore       | MAR; RFA                |
| 24  | Gymnothorax reevesii                 | NE   | Omnivore       | MAR; RFA                |
| 25  | Gymnothorax reticularis              | NE   | Carnivore      | MAR; DEM                |
|     | Strophidon                           |      |                |                         |
| 26  | Strophidon sathete                   | NE   | Carnivore      | MAR; FRE; BRA; RFA      |
|     | Uropterygius                         |      |                |                         |
| 27  | Uropterygius concolor                | LC   | Omnivore       | MAR; BRA; RFA           |
|     | Ophichthidae                         |      |                |                         |
|     | Lamnostoma                           |      |                |                         |
| 28  | Lamnostoma mindora                   | NE   | Omnivore       | FRE; DEM                |
|     | Muraenichthys                        |      |                |                         |
| 29  | Muraenichthys gymnopterus            | NE   | Omnivore       | MAR; BRA; RFA           |
| 30  | Muraenichthys thompsoni              | NE   | Omnivore       | MAR; BRA; DEM           |
|     | Myrichthys                           |      |                |                         |
| 31  | Myrichthys maculosus                 | NE   | Carnivore      | MAR; RFA                |
|     | Ophichthus                           |      |                |                         |
| 32  | Ophichthus apicalis                  | NE   | Omnivore       | MAR; BRA; DEM           |
| 33  | Ophichthus asakusae                  | NE   | Omnivore       | MAR; DEM                |
| 34  | Ophichthus brevicaudatus             | NE   | Omnivore       | MAR; DEM                |
| 35  | Ophichthus celebicus                 | NE   | Omnivore       | MAR; DEM                |
| 36  | Ophichthus macrochir                 | NE   | Omnivore       | MAR; BRA; DEM           |
|     | Pisodonophis                         |      |                |                         |
| 37  | Pisodonophis boro                    | LC   | Carnivore      | MAR; FRE; BRA; DEM; ANA |
| 38  | Pisodonophis cancrivorus             | NE   | Carnivore      | MAR; FRE; BRA; RFA; ANA |
|     | Scolecenchelys                       |      |                |                         |
| 39  | Scolecenchelys macroptera            | NE   | Omnivore       | MAR; RFA                |
|     | Synphobranchidae                     |      |                |                         |
|     | Dysomma                              |      |                |                         |
| 40  | Dysomma dolichosomatum               | NE   | Omnivore       | MAR; DEM                |
|     | Atheriniformes                       |      |                |                         |

| No. | Class, Order, Family, Genus, Species | IUCN | Feeding habits | Habitat                |
|-----|--------------------------------------|------|----------------|------------------------|
|     | Atherinidae                          |      |                |                        |
|     | Atherinomorus                        |      |                |                        |
| 41  | Atherinomorus lacunosus              | NE   | Carnivore      | MAR; FRE; BRA; RFA     |
|     | Hypoatherina                         |      |                |                        |
| 42  | Hypoatherina tsurugae                | NE   | Carnivore      | MAR; PE                |
| 43  | Hypoatherina valenciennei            | NE   | Carnivore      | MAR; BRA; PE           |
|     | Aulopiformes                         |      |                |                        |
|     | Paralepidae                          |      |                |                        |
|     | Lestidium                            |      |                |                        |
| 44  | Lestidium atlanticum                 | LC   | Omnivore       | MAR; BAP               |
|     | Synodontidae                         |      |                |                        |
|     | Harpadon                             |      |                |                        |
| 45  | Harpadon nehereus                    | NT   | Carnivore      | MAR; BRA; BEP; OD      |
|     | Saurida                              |      |                |                        |
| 46  | Saurida elongata                     | LC   | Carnivore      | MAR; DEM               |
| 47  | Saurida tumbil                       | LC   | Carnivore      | MAR; RFA; AMP          |
| 48  | Saurida undosquamis                  | LC   | Carnivore      | MAR; RFA; AMP          |
| 49  | Saurida wanieso                      | DD   | Carnivore      | MAR; DEM               |
|     | Synodus                              |      |                |                        |
| 50  | Synodus macrops                      | LC   | Omnivore       | MAR; DEM               |
| 51  | Synodus variegatus                   | LC   | Carnivore      | MAR; RFA               |
|     | Trachinocephalus                     |      |                |                        |
| 52  | Trachinocephalus myops               | LC   | Carnivore      | MAR; RFA               |
|     | Beloniformes                         |      |                |                        |
|     | Adrianichthyidae                     |      |                |                        |
|     | Oryzias                              |      |                |                        |
| 53  | Oryzias curvinotus                   | DD   | Omnivore       | FRE; BRA               |
|     | Belonidae                            |      |                |                        |
|     | Strongylura                          |      |                |                        |
| 54  | Strongylura leiura                   | NE   | Carnivore      | MAR; BRA; RFA          |
| 55  | Strongylura strongylura              | NE   | Carnivore      | MAR; BRA; PE           |
|     | Tylosurus                            |      |                |                        |
| 56  | Tylosurus acus                       | LC   | Carnivore      | MAR; RFA               |
| 57  | Tylosurus crocodilus                 | LC   | Carnivore      | MAR; RFA               |
|     | Exocoetidae                          |      |                |                        |
|     | Cheilopogon                          |      |                |                        |
| 58  | Cheilopogon spilopterus              | NE   | Carnivore      | MAR; PE                |
|     | Hirundichthys                        |      |                |                        |
| 59  | Hirundichthys rondeletii             | LC   | Omnivore       | MAR; PELO              |
|     | Hemiramphidae                        |      |                |                        |
|     | Hemiramphus                          |      |                |                        |
| 60  | Hemiramphus lutkei                   | NE   | Omnivore       | MAR; BRA; RFA          |
|     | Hyporhamphus                         |      |                |                        |
| 61  | Hyporhamphus affinis                 | NE   | Carnivore      | MAR; RFA               |
| 62  | Hyporhamphus dussumieri              | NE   | Carnivore      | MAR; RFA               |
| 63  | Hyporhamphus gernaerti               | NE   | Omnivore       | MAR; PE                |
| 64  | Hyporhamphus intermedius             | NE   | Carnivore      | MAR; FRE; BRA; PE; AMP |

Supplementary Material

| No. | Class, Order, Family, Genus, Species | IUCN | Feeding habits | Habitat                |
|-----|--------------------------------------|------|----------------|------------------------|
| 65  | Hyporhamphus limbatus                | LC   | Carnivore      | MAR; FRE; BRA; PE      |
| 66  | Hyporhamphus quoyi                   | NE   | Carnivore      | MAR; FRE; BRA; PE      |
|     | Zenarchopterus                       |      |                |                        |
| 67  | Zenarchopterus buffonis              | LC   | Herbivore      | MAR; BRA; RFA          |
| 68  | Zenarchopterus philippinus           | LC   | Omnivore       | FRE; PEL               |
| 69  | Zenarchopterus striga                | LC   | Omnivore       | FRE; BRA; PEL          |
|     | Cichliformes                         |      |                |                        |
|     | Cichlidae                            |      |                |                        |
|     | Coptodon                             |      |                |                        |
| 70  | Coptodon zillii                      | LC   | Omnivore       | FRE; BRA               |
|     | Oreochromis                          |      |                |                        |
| 71  | Oreochromis aureus*                  | NE   | Omnivore       | FRE; BRA; BEP          |
| 72  | Oreochromis hybrid                   | NE   | Omnivore       | FRE; BRA; BEP          |
| 73  | Oreochromis mossambicus*             | VU   | Omnivore       | FRE; BRA; BEP          |
| 74  | Oreochromis niloticus*               | LC   | Omnivore       | FRE; BRA; BEP          |
|     | Clupeiformes                         |      |                |                        |
|     | Chirocentridae                       |      |                |                        |
|     | Chirocentrus                         |      |                |                        |
| 75  | Chirocentrus dorab                   | LC   | Carnivore      | MAR; BRA; RFA          |
|     | Clupeidae                            |      |                |                        |
|     | Clupanodon                           |      |                |                        |
| 76  | Clupanodon thrissa                   | LC   | Omnivore       | MAR; FRE; BRA; PE; ANA |
|     | Dussumieria                          |      |                |                        |
| 77  | Dussumieria elopsoidea               | LC   | Carnivore      | MAR; PE                |
|     | Escualosa                            |      |                |                        |
| 78  | Escualosa thoracata                  | LC   | Carnivore      | MAR; FRE; BRA; PE; AMP |
|     | Etrumeus                             |      |                |                        |
| 79  | Etrumeus sadina                      | LC   | Carnivore      | MAR; PE; OD            |
|     | Herklotsichthys                      |      |                |                        |
| 80  | Herklotsichthys ovalis               | DD   | Omnivore       | MAR; PE                |
| 81  | Herklotsichthys quadrimaculatus      | LC   | Carnivore      | MAR; FRE; BRA; RFA     |
|     | Konosirus                            |      |                |                        |
| 82  | Konosirus punctatus                  | LC   | Carnivore      | MAR; BRA; PE; OD       |
|     | Nematalosa                           |      |                |                        |
| 83  | Nematalosa come                      | LC   | Carnivore      | MAR; PE                |
| 84  | Nematalosa japonica                  | DD   | Detritivore    | MAR; BEP               |
| 85  | Nematalosa nasus                     | LC   | Herbivore      | MAR; FRE; BRA; PE      |
|     | Sardinella                           |      |                |                        |
| 86  | Sardinella albella                   | LC   | Herbivore      | MAR; BRA; RFA          |
| 87  | Sardinella aurita                    | LC   | Herbivore      | MAR; BRA; PE; OD       |
| 88  | Sardinella brachysoma                | LC   | Omnivore       | MAR; PE                |
| 89  | Sardinella fimbriata                 | LC   | Herbivore      | MAR; BRA; PE           |
| 90  | Sardinella hualiensis                | LC   | Omnivore       | MAR; PE                |
| 91  | Sardinella jussieu                   | DD   | Omnivore       | MAR; PE                |
| 92  | Sardinella lemuru                    | NT   | Herbivore      | MAR; PE                |
| 93  | Sardinella melanura                  | LC   | Omnivore       | MAR; PE; AMP           |

| No. | Class, Order, Family, Genus, Species | IUCN | Feeding habits | Habitat           |
|-----|--------------------------------------|------|----------------|-------------------|
| 94  | <i>Sardinella richardsoni</i>        | DD   | Omnivore       | MAR; PE           |
| 95  | <i>Sardinella sindensis</i>          | LC   | Omnivore       | MAR; PE           |
| 96  | <i>Sardinella zunasi</i>             | LC   | Carnivore      | MAR; PE; OD       |
|     | Spratelloides                        |      |                |                   |
| 97  | <i>Spratelloides gracilis</i>        | LC   | Carnivore      | MAR; PE           |
|     | Tenuالosa                            |      |                |                   |
| 98  | <i>Tenuالosa ilisha</i>              | LC   | Detrivore      | MAR; FRE; BRA; PE |
|     | Engraulidae                          |      |                |                   |
|     | Coilia                               |      |                |                   |
| 99  | <i>Coilia grayii</i>                 | LC   | Omnivore       | MAR; FRE; BRA; PE |
| 100 | <i>Coilia mystus</i>                 | EN   | Carnivore      | MAR; FRE; BRA; PE |
|     | Encrasicholina                       |      |                |                   |
| 101 | <i>Encrasicholina punctifer</i>      | LC   | Omnivore       | MAR; RFA; OD      |
|     | Engraulis                            |      |                |                   |
| 102 | <i>Engraulis japonicus</i>           | LC   | Herbivore      | MAR; PE           |
|     | Setipinna                            |      |                |                   |
| 103 | <i>Setipinna taty</i>                | LC   | Carnivore      | MAR; BRA; PE      |
| 104 | <i>Setipinna tenuifilis</i>          | DD   | Carnivore      | MAR; FRE; BRA; PE |
|     | Stolephorus                          |      |                |                   |
| 105 | <i>Stolephorus chinensis</i>         | LC   | Omnivore       | MAR; PE           |
| 106 | <i>Stolephorus commersonnii</i>      | LC   | Carnivore      | MAR; BRA; PE      |
| 107 | <i>Stolephorus indicus</i>           | LC   | Carnivore      | MAR; BRA; PE; OD  |
| 108 | <i>Stolephorus insularis</i>         | DD   | Omnivore       | MAR; BRA; RFA     |
| 109 | <i>Stolephorus tri</i>               | NE   | Omnivore       | MAR; BRA; PE      |
|     | Thryssa                              |      |                |                   |
| 110 | <i>Thryssa chefuensis</i>            | DD   | Omnivore       | MAR; PE           |
| 111 | <i>Thryssa dussumieri</i>            | LC   | Carnivore      | MAR; BRA; PE      |
| 112 | <i>Thryssa kammalensis</i>           | DD   | Carnivore      | MAR; BRA; PE      |
| 113 | <i>Thryssa mystax</i>                | LC   | Carnivore      | MAR; BRA; PELO    |
| 114 | <i>Thryssa setirostris</i>           | LC   | Carnivore      | MAR; BRA; PE      |
| 115 | <i>Thryssa vitrirostris</i>          | LC   | Omnivore       | MAR; BRA; PE      |
|     | Pristigasteridae                     |      |                |                   |
|     | Ilisha                               |      |                |                   |
| 116 | <i>Ilisha elongata</i>               | LC   | Carnivore      | MAR; BRA; PE      |
| 117 | <i>Ilisha melastoma</i>              | LC   | Carnivore      | MAR; BRA; PE; AMP |
|     | Cypriniformes                        |      |                |                   |
|     | Cobitidae                            |      |                |                   |
|     | Misgurnus                            |      |                |                   |
| 118 | <i>Misgurnus anguillicaudatus</i>    | LC   | Carnivore      | FRE; BRA; DEM     |
|     | Cyprinidae                           |      |                |                   |
|     | Barbodes                             |      |                |                   |
| 119 | <i>Barbodes snyderi</i>              | NE   | Omnivore       | FRE               |
|     | Carassius                            |      |                |                   |
| 120 | <i>Carassius auratus*</i>            | LC   | Detrivore      | FRE; BRA; BEP     |
|     | Chanodichthys                        |      |                |                   |
| 121 | <i>Chanodichthys erythropterus</i>   | LC   | Herbivore      | FRE; BRA          |
|     | Cirrhinus                            |      |                |                   |

Supplementary Material

| No. | Class, Order, Family, Genus, Species | IUCN | Feeding habits | Habitat                 |
|-----|--------------------------------------|------|----------------|-------------------------|
| 122 | Cirrhinus molitorella                | NT   | Detrivore      | FRE; BEP                |
|     | Cyprinus                             |      |                |                         |
| 123 | Cyprinus carpio*                     | VU   | Herbivore      | FRE; BRA                |
|     | Hemibarbus                           |      |                |                         |
| 124 | Hemibarbus maculatus                 | NE   | Carnivore      | FRE; BEP                |
|     | Hemiculter                           |      |                |                         |
| 125 | Hemiculter leucisculus               | LC   | Herbivore      | FRE; BRA                |
|     | Henicorhynchus                       |      |                |                         |
| 126 | Henicorhynchus siamensis             | NE   | Detrivore      | FRE; BEP                |
|     | Hypophthalmichthys                   |      |                |                         |
| 127 | Hypophthalmichthys molitrix          | NT   | Detrivore      | FRE; BRA; BEP           |
|     | Megalobrama                          |      |                |                         |
| 128 | Megalobrama terminalis               | NE   | Omnivore       | FRE; BEP                |
|     | Metzia                               |      |                |                         |
| 129 | Metzia lineata                       | LC   | Omnivore       | FRE                     |
| 130 | Metzia mesembrinum                   | NE   | Omnivore       | FRE; PEL                |
|     | Pseudorasbora                        |      |                |                         |
| 131 | Pseudorasbora parva                  | LC   | Carnivore      | FRE; BRA; BEP           |
|     | Squalidus                            |      |                |                         |
| 132 | Squalidus argentatus                 | DD   | Omnivore       | FRE; BRA; BEP           |
|     | Cyprinodontiformes                   |      |                |                         |
|     | Poeciliidae                          |      |                |                         |
|     | Gambusia                             |      |                |                         |
| 133 | Gambusia affinis*                    | LC   | Carnivore      | FRE; BRA                |
|     | Poecilia                             |      |                |                         |
| 134 | Poecilia reticulata*                 | LC   | Carnivore      | FRE; BRA; BEP           |
| 135 | Poecilia velifera*                   | VU   | Herbivore      | FRE; BRA; BEP           |
|     | Elopiformes                          |      |                |                         |
|     | Albulidae                            |      |                |                         |
|     | Albula                               |      |                |                         |
| 136 | Albula vulpes                        | NT   | Carnivore      | MAR; BRA; RFA           |
|     | Elopidae                             |      |                |                         |
|     | Elops                                |      |                |                         |
| 137 | Elops hawaiiensis                    | DD   | Carnivore      | MAR; FRE; BRA; PE       |
| 138 | Elops machnata                       | LC   | Carnivore      | MAR; BRA; PE            |
| 139 | Elops saurus                         | LC   | Carnivore      | MAR; BRA; RFA           |
|     | Megalopidae                          |      |                |                         |
|     | Megalops                             |      |                |                         |
| 140 | Megalops cyprinoides                 | DD   | Carnivore      | MAR; FRE; BRA; BEP; AMP |
|     | Gadiformes                           |      |                |                         |
|     | Moridae                              |      |                |                         |
|     | Lotella                              |      |                |                         |
| 141 | Lotella tosaensis                    | NE   | Omnivore       | MAR; DEM                |
|     | Gasterosteiformes                    |      |                |                         |
|     | Syngnathidae                         |      |                |                         |
|     | Corythoichthys                       |      |                |                         |

| No. | Class, Order, Family, Genus, Species | IUCN | Feeding habits | Habitat                 |
|-----|--------------------------------------|------|----------------|-------------------------|
| 142 | Corythoichthys flavofasciatus        | LC   | Omnivore       | MAR; RFA                |
|     | Hippichthys                          |      |                |                         |
| 143 | Hippichthys cyanospilos              | LC   | Omnivore       | MAR; FRE; BRA; DEM      |
| 144 | Hippichthys heptagonus               | LC   | Omnivore       | FRE; BRA; DEM           |
| 145 | Hippichthys penicillus               | LC   | Omnivore       | MAR; FRE; BRA; DEM      |
| 146 | Hippichthys spicifer*                | LC   | Omnivore       | MAR; FRE; BRA; DEM      |
|     | Hippocampus                          |      |                |                         |
| 147 | Hippocampus kuda*                    | VU   | Omnivore       | MAR; BRA; RFA           |
|     | Phoxocampus                          |      |                |                         |
| 148 | Phoxocampus belcheri                 | LC   | Omnivore       | MAR; RFA                |
|     | Syngnathus                           |      |                |                         |
| 149 | Syngnathus acus                      | LC   | Carnivore      | MAR; BRA; DEM           |
|     | Gobiesociformes                      |      |                |                         |
|     | Gobiesocidae                         |      |                |                         |
|     | Acyrtus                              |      |                |                         |
| 150 | Acyrtus rubiginosus                  | LC   | Carnivore      | MAR; DEM                |
|     | Gonorhynchiformes                    |      |                |                         |
|     | Chanidae                             |      |                |                         |
|     | Chanos                               |      |                |                         |
| 151 | Chanos chanos                        | LC   | Detrivore      | MAR; FRE; BRA; BEP; AMP |
|     | Mugiliformes                         |      |                |                         |
|     | Mugilidae                            |      |                |                         |
|     | Crenimugil                           |      |                |                         |
| 152 | Crenimugil buehneri                  | NE   | Detrivore      | MAR; FRE; BRA; PE       |
| 153 | Crenimugil seheli                    | LC   | Herbivore      | MAR; FRE; BRA; RFA      |
|     | Ellochelon                           |      |                |                         |
| 154 | Ellochelon vaigiensis                | LC   | Herbivore      | MAR; FRE; BRA; RFA      |
|     | Mugil                                |      |                |                         |
| 155 | Mugil cephalus*                      | LC   | Omnivore       | MAR; FRE; BRA; BEP      |
|     | Osteomugil                           |      |                |                         |
| 156 | Osteomugil cunnesius                 | NE   | Herbivore      | MAR; FRE; BRA; DEM      |
| 157 | Osteomugil perusii                   | LC   | Omnivore       | MAR; BRA; RFA           |
| 158 | Osteomugil strongylocephalus         | NE   | Herbivore      |                         |
|     | Paramugil                            |      |                |                         |
| 159 | Paramugil parvatus                   | LC   | Omnivore       | MAR; FRE; BRA; DEM      |
|     | Planiliza                            |      |                |                         |
| 160 | Planiliza affinis                    | NE   | Detrivore      | MAR; BRA; PE            |
| 161 | Planiliza alata                      | LC   | Herbivore      | MAR; FRE; BRA; BEP      |
| 162 | Planiliza carinata                   | NE   | Omnivore       | MAR; BRA; PE            |
| 163 | Planiliza haematocheilus             | NE   | Herbivore      | MAR; FRE; BRA; PE       |
| 164 | Planiliza macrolepis                 | LC   | Herbivore      | MAR; FRE; BRA; DEM      |
| 165 | Planiliza melinoptera                | NE   | Herbivore      | MAR; FRE; BRA; RFA      |
| 166 | Planiliza subviridis                 | NE   | Herbivore      | MAR; FRE; BRA; DEM      |
|     | Polynemidae                          |      |                |                         |
|     | Eleutheronema                        |      |                |                         |
| 167 | Eleutheronema tetradactylum          | NE   | Carnivore      | MAR; FRE; BRA; PE; AMP  |
|     | Polydactylus                         |      |                |                         |

Supplementary Material

| No. | Class, Order, Family, Genus, Species | IUCN | Feeding habits | Habitat                 |
|-----|--------------------------------------|------|----------------|-------------------------|
| 168 | Polydactylus sextarius               | NE   | Carnivore      | MAR; BRA; DEM; AMP      |
|     | Sphyraenidae                         |      |                |                         |
|     | Sphyraena                            |      |                |                         |
| 169 | Sphyraena forsteri                   | NE   | Carnivore      | MAR; RFA                |
| 170 | Sphyraena pinguis                    | NE   | Carnivore      | MAR; PE                 |
|     | Myctophiformes                       |      |                |                         |
|     | Myctophidae                          |      |                |                         |
|     | Benthoosema                          |      |                |                         |
| 171 | Benthoosema pterotum                 | LC   | Carnivore      | MAR; BEP                |
|     | Pegasiformes                         |      |                |                         |
|     | Pegasidae                            |      |                |                         |
|     | Pegasus                              |      |                |                         |
| 172 | Pegasus volitans                     | DD   | Carnivore      | MAR; BRA; DEM           |
|     | Perciformes                          |      |                |                         |
|     | Acanthuridae                         |      |                |                         |
|     | Acanthurus                           |      |                |                         |
| 173 | Acanthurus xanthopterus              | LC   | Herbivore      | MAR; RFA                |
|     | Ambassidae                           |      |                |                         |
|     | Ambassis                             |      |                |                         |
| 174 | Ambassis gymnocephalus               | LC   | Carnivore      | MAR; FRE; BRA; DEM      |
| 175 | Ambassis interruptus                 | LC   | Herbivore      | MAR; FRE; BRA; DEM; AMP |
| 176 | Ambassis kopsii                      | NE   | Carnivore      | MAR; FRE; BRA; DEM; AMP |
| 177 | Ambassis marianus                    | LC   | Omnivore       |                         |
| 178 | Ambassis miops                       | LC   | Carnivore      | MAR; FRE; BRA; DEM; AMP |
| 179 | Ambassis urotaenia                   | LC   | Omnivore       | MAR; FRE; BRA; DEM; AMP |
|     | Anabantidae                          |      |                |                         |
|     | Anabas                               |      |                |                         |
| 180 | Anabas testudineus*                  | LC   | Herbivore      | FRE; BRA; DEM           |
|     | Apogonidae                           |      |                |                         |
|     | Apogon                               |      |                |                         |
| 181 | Apogon striatus                      | NE   | Omnivore       | MAR; RFA                |
|     | Apogonichthyoides                    |      |                |                         |
| 182 | Apogonichthyoides taeniatus          | NE   | Carnivore      | MAR; RFA                |
|     | Jaydia                               |      |                |                         |
| 183 | Jaydia ellioti                       | NE   | Carnivore      | MAR; RFA                |
| 184 | Jaydia lineata                       | NE   | Carnivore      | MAR; DEM                |
|     | Ostorhinchus                         |      |                |                         |
| 185 | Ostorhinchus cookii                  | NE   | Carnivore      | MAR; RFA                |
| 186 | Ostorhinchus fasciatus               | NE   | Carnivore      |                         |
| 187 | Ostorhinchus kiensis                 | NE   | Omnivore       | MAR; BRA; RFA           |
| 188 | Ostorhinchus notatus                 | NE   | Carnivore      | MAR; RFA                |
|     | Taeniamia                            |      |                |                         |
| 189 | Taeniamia fucata                     | NE   | Carnivore      | MAR; RFA                |
| 190 | Taeniamia lineolata                  | NE   | Carnivore      | MAR; RFA                |
|     | Blenniidae                           |      |                |                         |
|     | Istiblennius                         |      |                |                         |



| No. | Class, Order, Family, Genus, Species | IUCN | Feeding habits | Habitat            |
|-----|--------------------------------------|------|----------------|--------------------|
| 191 | Istiblennius dussumieri              | LC   | Detrivore      | MAR; BRA; RFA      |
|     | Omobranchus                          |      |                |                    |
| 192 | Omobranchus elegans                  | LC   | Detrivore      | MAR; DEM           |
| 193 | Omobranchus fasciolatoceps           | LC   | Omnivore       | MAR; DEM           |
| 194 | Omobranchus punctatus                | LC   | Omnivore       | MAR; BRA; BEP      |
|     | Petroscirtes                         |      |                |                    |
| 195 | Petroscirtes breviceps               | LC   | Detrivore      | MAR; BRA; RFA      |
|     | Praealticus                          |      |                |                    |
| 196 | Praealticus striatus                 | LC   | Detrivore      | MAR; DEM           |
|     | Salarias                             |      |                |                    |
| 197 | Salarias fasciatus                   | LC   | Detrivore      | MAR; BRA; RFA      |
|     | Scartella                            |      |                |                    |
| 198 | Scartella cristata                   | LC   | Detrivore      | MAR; RFA           |
|     | Callionymidae                        |      |                |                    |
|     | Callionymus                          |      |                |                    |
| 199 | Callionymus beniteguri               | NE   | Omnivore       | MAR; DEM           |
| 200 | Callionymus curvicornis              | NE   | Carnivore      | MAR; FRE; BRA; DEM |
| 201 | Callionymus doryssus                 | NE   | Omnivore       | MAR; DEM           |
| 202 | Callionymus filamentosus             | NE   | Carnivore      | MAR; DEM           |
| 203 | Callionymus hainanensis              | NE   | Omnivore       | MAR; DEM           |
| 204 | Callionymus hindsii                  | NE   | Omnivore       | MAR; DEM           |
| 205 | Callionymus marquesensis             | NE   | Omnivore       | MAR; DEM           |
| 206 | Callionymus planus                   | NE   | Omnivore       | MAR; DEM           |
| 207 | Callionymus sagitta                  | LC   | Herbivore      | MAR; BRA; DEM      |
| 208 | Callionymus schaapii                 | NE   | Omnivore       | MAR; BRA; DEM      |
| 209 | Callionymus valenciennesi            | NE   | Omnivore       | MAR; DEM           |
|     | Repomucenus                          |      |                |                    |
| 210 | Repomucenus olidus                   | NE   | Omnivore       | FRE; BRA; DEM      |
| 211 | Repomucenus virgis                   | NE   | Omnivore       | MAR; DEM           |
|     | Carangidae                           |      |                |                    |
|     | Alectis                              |      |                |                    |
| 212 | Alectis ciliaris                     | LC   | Carnivore      | MAR; RFA           |
| 213 | Alectis indica                       | LC   | Carnivore      | MAR; BRA; RFA      |
|     | Alepes                               |      |                |                    |
| 214 | Alepes djedaba                       | LC   | Carnivore      | MAR; RFA; AMP      |
| 215 | Alepes kleinii                       | LC   | Carnivore      | MAR; RFA           |
| 216 | Alepes melanoptera                   | LC   | Carnivore      | MAR; BRA; PE       |
| 217 | Alepes vari                          | LC   | Carnivore      | MAR; BRA; PE       |
|     | Atropus                              |      |                |                    |
| 218 | Atropus atropus                      | LC   | Carnivore      | MAR; PE; AMP       |
|     | Atule                                |      |                |                    |
| 219 | Atule mate                           | LC   | Carnivore      | MAR; BRA; RFA      |
|     | Carangoides                          |      |                |                    |
| 220 | Carangoides equula                   | LC   | Carnivore      | MAR; RFA           |
| 221 | Carangoides malabaricus              | LC   | Carnivore      | MAR; RFA; AMP      |
| 222 | Carangoides orthogrammus             | LC   | Carnivore      | MAR; RFA; OD       |
| 223 | Carangoides praeustus                | LC   | Omnivore       | MAR; DEM; OD       |

Supplementary Material

| No. | Class, Order, Family, Genus, Species | IUCN | Feeding habits | Habitat                 |
|-----|--------------------------------------|------|----------------|-------------------------|
|     | Caranx                               |      |                |                         |
| 224 | Caranx ignobilis                     | LC   | Carnivore      | MAR; BRA; RFA           |
| 225 | Caranx melampygus                    | LC   | Carnivore      | MAR; BRA; RFA           |
| 226 | Caranx papuensis                     | LC   | Carnivore      | MAR; BRA; RFA           |
| 227 | Caranx sexfasciatus                  | LC   | Carnivore      | MAR; FRE; BRA; RFA; AMP |
|     | Decapterus                           |      |                |                         |
| 228 | Decapterus maruadsi                  | LC   | Carnivore      | MAR; RFA                |
| 229 | Decapterus russelli                  | LC   | Carnivore      | MAR; BEP                |
|     | Elagatis                             |      |                |                         |
| 230 | Elagatis bipinnulata                 | LC   | Carnivore      | MAR; RFA                |
|     | Megalaspis                           |      |                |                         |
| 231 | Megalaspis cordyla                   | LC   | Carnivore      | MAR; BRA; RFA           |
|     | Parastromateus                       |      |                |                         |
| 232 | Parastromateus niger                 | LC   | Carnivore      | MAR; BRA; RFA; AMP      |
|     | Scomberoides                         |      |                |                         |
| 233 | Scomberoides commersonnianus         | LC   | Carnivore      | MAR; BRA; RFA; AMP      |
| 234 | Scomberoides lysan                   | LC   | Carnivore      | MAR; BRA; RFA           |
| 235 | Scomberoides tala                    | LC   | Carnivore      | MAR; RFA                |
| 236 | Scomberoides tol                     | LC   | Carnivore      | MAR; BRA; RFA           |
|     | Selaroides                           |      |                |                         |
| 237 | Selaroides leptolepis                | LC   | Carnivore      | MAR; BRA; RFA; AMP      |
|     | Trachinotus                          |      |                |                         |
| 238 | Trachinotus bailloni                 | LC   | Carnivore      | MAR; BRA; RFA           |
| 239 | Trachinotus blochii                  | LC   | Carnivore      | MAR; BRA; RFA           |
| 240 | Trachinotus ovatus                   | LC   | Carnivore      | MAR; BRA; PE            |
|     | Trachurus                            |      |                |                         |
| 241 | Trachurus japonicus                  | NT   | Carnivore      | MAR; PE; OD             |
|     | Uraspis                              |      |                |                         |
| 242 | Uraspis uraspis                      | LC   | Carnivore      | MAR; RFA                |
|     | Centrolophidae                       |      |                |                         |
|     | Psenopsis                            |      |                |                         |
| 243 | Psenopsis anomala                    | LC   | Carnivore      | MAR; BEP                |
|     | Cepolidae                            |      |                |                         |
|     | Acanthocephala                       |      |                |                         |
| 244 | Acanthocephala limbata               | NE   | Omnivore       | MAR; DEM                |
|     | Chaetodontidae                       |      |                |                         |
|     | Chaetodon                            |      |                |                         |
| 245 | Chaetodon auriga                     | LC   | Carnivore      | MAR; RFA                |
| 246 | Chaetodon vagabundus*                | LC   | Carnivore      | MAR; RFA                |
|     | Roa                                  |      |                |                         |
| 247 | Roa modesta                          | LC   | Carnivore      | MAR; RFA                |
|     | Channidae                            |      |                |                         |
|     | Channa                               |      |                |                         |
| 248 | Channa gachua                        | LC   | Carnivore      | FRE; BEP                |
| 249 | Channa maculata                      | LC   | Carnivore      | FRE; BEP                |
|     | Drepaneidae                          |      |                |                         |

| No. | Class, Order, Family, Genus, Species | IUCN | Feeding habits | Habitat                 |
|-----|--------------------------------------|------|----------------|-------------------------|
|     | Drepane                              |      |                |                         |
| 250 | Drepane longimana                    | NE   | Carnivore      | MAR; BRA; RFA           |
| 251 | Drepane punctata                     | NE   | Carnivore      | MAR; FRE; BRA; RFA      |
|     | Echeneidae                           |      |                |                         |
|     | Echeneis                             |      |                |                         |
| 252 | Echeneis naucrates                   | LC   | Carnivore      | MAR; BRA; RFA           |
|     | Eleotridae                           |      |                |                         |
|     | Bostrychus                           |      |                |                         |
| 253 | Bostrychus sinensis                  | LC   | Carnivore      | MAR; FRE; BRA; DEM; AMP |
|     | Butis                                |      |                |                         |
| 254 | Butis butis                          | LC   | Carnivore      | MAR; FRE; BRA; DEM      |
| 255 | Butis gymnopomus                     | LC   | Omnivore       | FRE; BRA; DEM           |
| 256 | Butis koilomatodon                   | NE   | Carnivore      | MAR; FRE                |
| 257 | Butis melanostigma                   | NE   | Omnivore       | MAR; FRE; BRA; DEM; AMP |
|     | Eleotris                             |      |                |                         |
| 258 | Eleotris acanthopoma                 | LC   | Carnivore      | MAR; FRE; BRA; DEM; AMP |
| 259 | Eleotris fusca*                      | LC   | Carnivore      | MAR; FRE; BRA; DEM; AMP |
| 260 | Eleotris melanosoma                  | LC   | Omnivore       | MAR; FRE; BRA; DEM; AMP |
| 261 | Eleotris oxycephala                  | LC   | Omnivore       | MAR; FRE; BRA; DEM; AMP |
|     | Ophiocara                            |      |                |                         |
| 262 | Ophiocara porocephala                | LC   | Carnivore      | MAR; FRE; BRA; DEM; AMP |
|     | Prionobutis                          |      |                |                         |
| 263 | Prionobutis dasyrhynchus             | DD   | Omnivore       | FRE; DEM                |
|     | Ephippidae                           |      |                |                         |
|     | Ephippus                             |      |                |                         |
| 264 | Ephippus orbis                       | NE   | Carnivore      | MAR; RFA                |
|     | Platax                               |      |                |                         |
| 265 | Platax orbicularis                   | LC   | Carnivore      | MAR; BRA; RFA           |
|     | Gerridae                             |      |                |                         |
|     | Gerres                               |      |                |                         |
| 266 | Gerres erythrourus                   | LC   | Carnivore      | MAR; BRA; RFA; OD       |
| 267 | Gerres filamentosus                  | LC   | Carnivore      | MAR; FRE; BRA; DEM; AMP |
| 268 | Gerres japonicus                     | NE   | Omnivore       | MAR; DEM                |
| 269 | Gerres limbatus                      | LC   | Carnivore      | MAR; BRA; DEM; AMP      |
| 270 | Gerres longirostris                  | LC   | Carnivore      | MAR; FRE; BRA; RFA; AMP |
| 271 | Gerres macracanthus                  | NE   | Omnivore       | MAR; BRA; DEM           |
| 272 | Gerres oblongus                      | LC   | Carnivore      | MAR; RFA                |
| 273 | Gerres oyena                         | LC   | Carnivore      | MAR; BRA; RFA           |
|     | Pentaprion                           |      |                |                         |
| 274 | Pentaprion longimanus                | LC   | Carnivore      | MAR; BRA; DEM           |
|     | Gobiidae                             |      |                |                         |
|     | Acanthogobius                        |      |                |                         |
| 275 | Acanthogobius flavimanus             | LC   | Carnivore      | MAR; FRE; BRA; DEM; AMP |
| 276 | Acanthogobius hasta                  | LC   | Carnivore      | MAR; FRE; BRA; DEM; AMP |
|     | Acentrogobius                        |      |                |                         |
| 277 | Acentrogobius caninus                | LC   | Herbivore      | MAR; FRE; BRA; DEM; AMP |
| 278 | Acentrogobius chlorostigmatoides     | NE   | Omnivore       | FRE; BRA; DEM           |

| No. | Class, Order, Family, Genus, Species | IUCN | Feeding habits | Habitat                 |
|-----|--------------------------------------|------|----------------|-------------------------|
| 279 | Acentrogobius janthinopterus         | LC   | Omnivore       | MAR; FRE; BRA; RFA; AMP |
| 280 | Acentrogobius nebulosus              | LC   | Omnivore       | MAR; FRE; BRA; RFA; AMP |
| 281 | Acentrogobius pflaumii               | NE   | Carnivore      | MAR; BRA; DEM           |
| 282 | Acentrogobius viganensis             | NE   | Omnivore       | MAR; BRA; DEM           |
| 283 | Acentrogobius viridipunctatus        | LC   | Omnivore       | MAR; FRE; BRA; DEM; AMP |
|     | Amblychaeturichthys                  |      |                |                         |
| 284 | Amblychaeturichthys hexanema         | NE   | Carnivore      | MAR; DEM                |
|     | Amblyeleotris                        |      |                |                         |
| 285 | Amblyeleotris guttata                | LC   | Omnivore       | MAR; RFA                |
|     | Amblygobius                          |      |                |                         |
| 286 | Amblygobius albimaculatus            | LC   | Herbivore      | MAR; BRA; RFA           |
| 287 | Amblygobius phalaena                 | LC   | Herbivore      | MAR; RFA                |
|     | Amblyotrypauchen                     |      |                |                         |
| 288 | Amblyotrypauchen arctocephalus       | LC   | Omnivore       | MAR; DEM                |
|     | Amoya                                |      |                |                         |
| 289 | Amoya microps                        | NE   | Omnivore       |                         |
|     | Apocryptodon                         |      |                |                         |
| 290 | Apocryptodon madurensis              | NE   | Detritivore    | MAR; FRE; BRA; DEM; AMP |
| 291 | Apocryptodon punctatus               | LC   | Omnivore       | BRA; DEM                |
|     | Arcygobius                           |      |                |                         |
| 292 | Arcygobius baliurus                  | DD   | Omnivore       | MAR; BRA; DEM           |
|     | Aulopareia                           |      |                |                         |
| 293 | Aulopareia atripinnatus              | NE   | Omnivore       | BRA; DEM                |
|     | Awaous                               |      |                |                         |
| 294 | Awaous melanocephalus                | NE   | Omnivore       | MAR; FRE; BRA; BEP; AMP |
|     | Bathygobius                          |      |                |                         |
| 295 | Bathygobius cotticeps                | LC   | Omnivore       | MAR; BRA; RFA           |
| 296 | Bathygobius cyclopterus              | LC   | Omnivore       | MAR; BRA; RFA           |
| 297 | Bathygobius fuscus                   | LC   | Carnivore      | MAR; FRE; BRA; RFA; AMP |
|     | Caragobius                           |      |                |                         |
| 298 | Caragobius urolepis                  | LC   | Carnivore      | FRE; BRA; DEM; AMP      |
|     | Chaenogobius                         |      |                |                         |
| 299 | Chaenogobius annularis               | LC   | Omnivore       | FRE; DEM                |
|     | Chaeturichthys                       |      |                |                         |
| 300 | Chaeturichthys stigmatias            | NE   | Carnivore      | MAR; DEM                |
|     | Cotylopus                            |      |                |                         |
| 301 | Cotylopus rubripinnis                | VU   | Omnivore       | FRE; BEP                |
|     | Cryptocentrus                        |      |                |                         |
| 302 | Cryptocentrus pavoninoides           | DD   | Omnivore       | MAR; DEM                |
| 303 | Cryptocentrus yatsui                 | NE   | Omnivore       | MAR; DEM                |
|     | Ctenogobiops                         |      |                |                         |
| 304 | Ctenogobiops formosa                 | NE   | Omnivore       | MAR; RFA                |
|     | Ctenogobius                          |      |                |                         |
| 305 | Ctenogobius brevirostris             | NE   | Omnivore       |                         |
| 306 | Ctenogobius chusanensis              | NE   | Omnivore       | MAR; BRA; DEM           |
| 307 | Ctenogobius gymnauchen               | NE   | Omnivore       |                         |

| No. | Class, Order, Family, Genus, Species | IUCN | Feeding habits | Habitat                 |
|-----|--------------------------------------|------|----------------|-------------------------|
|     | Ctenotrypauchen                      |      |                |                         |
| 308 | Ctenotrypauchen chinensis            | NE   | Omnivore       | MAR; FRE; BRA; DEM      |
|     | Exyrias                              |      |                |                         |
| 309 | Exyrias belissimus                   | LC   | Herbivore      | MAR; RFA                |
| 310 | Exyrias puntang                      | LC   | Carnivore      | MAR; BRA; RFA           |
|     | Favonigobius                         |      |                |                         |
| 311 | Favonigobius gymnauchen              | NE   | Herbivore      | MAR; FRE; BRA; RFA; AMP |
| 312 | Favonigobius reichei                 | LC   | Omnivore       | MAR; FRE; BRA; DEM; AMP |
|     | Glossogobius                         |      |                |                         |
| 313 | Glossogobius aureus                  | LC   | Carnivore      | FRE; BRA; DEM; AMP      |
| 314 | Glossogobius bicirrhosus             | LC   | Omnivore       | MAR; FRE; BRA; DEM; AMP |
| 315 | Glossogobius circumspectus           | LC   | Omnivore       | FRE; BRA; DEM           |
| 316 | Glossogobius giuris*                 | LC   | Carnivore      | MAR; FRE; BRA; BEP; AMP |
| 317 | Glossogobius olivaceus               | LC   | Omnivore       | MAR; FRE; BRA; DEM; AMP |
|     | Gnatholepis                          |      |                |                         |
| 318 | Gnatholepis cauerensis               | LC   | Herbivore      | MAR; BRA; RFA           |
|     | Gobiopterus                          |      |                |                         |
| 319 | Gobiopterus lacustris                | DD   | Omnivore       | FRE; DEM                |
|     | Gobius                               |      |                |                         |
| 320 | Gobius poecilichthys                 | LC   | Omnivore       |                         |
|     | Gymnogobius                          |      |                |                         |
| 321 | Gymnogobius urotaenia                | NE   | Omnivore       |                         |
|     | Hemigobius                           |      |                |                         |
| 322 | Hemigobius hoevenii                  | LC   | Omnivore       | MAR; FRE; BRA; DEM; AMP |
|     | Istigobius                           |      |                |                         |
| 323 | Istigobius campbelli                 | NE   | Omnivore       | MAR; DEM                |
| 324 | Istigobius hoshinonis                | LC   | Omnivore       | MAR; DEM                |
|     | Luciogobius                          |      |                |                         |
| 325 | Luciogobius guttatus                 | NE   | Omnivore       | MAR; FRE; BRA; DEM; AMP |
|     | Mugilogobius                         |      |                |                         |
| 326 | Mugilogobius abei                    | LC   | Omnivore       | MAR; BRA; DEM           |
| 327 | Mugilogobius chulae                  | LC   | Carnivore      | MAR; FRE; BRA; DEM; AMP |
| 328 | Mugilogobius hoevenii                | NE   | Omnivore       |                         |
| 329 | Mugilogobius myxodermus              | NE   | Omnivore       | FRE; DEM                |
|     | Myersina                             |      |                |                         |
| 330 | Myersina filifer                     | LC   | Omnivore       | MAR; DEM                |
| 331 | Myersina papuanus                    | NE   | Omnivore       | MAR; DEM                |
|     | Odontamblyopus                       |      |                |                         |
| 332 | Odontamblyopus rubicundus            | LC   | Omnivore       | MAR; BRA; BEP           |
|     | Oligolepis                           |      |                |                         |
| 333 | Oligolepis acutipennis               | LC   | Carnivore      | MAR; FRE; BRA; DEM; AMP |
| 334 | Oligolepis fasciatus                 | NE   | Carnivore      |                         |
| 335 | Oligolepis jaarmani                  | LC   | Omnivore       | BRA; DEM                |
| 336 | Oligolepis moloana                   | NE   | Carnivore      |                         |
|     | Oxudercus                            |      |                |                         |
| 337 | Oxudercus dentatus                   | DD   | Omnivore       | FRE; BRA; DEM; AMP      |
|     | Oxyurichthys                         |      |                |                         |

| No. | Class, Order, Family, Genus, Species | IUCN | Feeding habits | Habitat                 |
|-----|--------------------------------------|------|----------------|-------------------------|
| 338 | Oxyurichthys cornutus                | NE   | Omnivore       | MAR; DEM                |
| 339 | Oxyurichthys microlepis              | LC   | Omnivore       | MAR; BRA; DEM; AMP      |
| 340 | Oxyurichthys ophthalmonema           | LC   | Omnivore       | MAR; FRE; BRA; DEM      |
| 341 | Oxyurichthys papuensis               | LC   | Carnivore      | MAR; BRA; RFA           |
| 342 | Oxyurichthys tentacularis            | DD   | Carnivore      | MAR; BRA; DEM; AMP      |
|     | Parachaeturichthys                   |      |                |                         |
| 343 | Parachaeturichthys polynema          | LC   | Carnivore      | MAR; DEM                |
|     | Parapocryptes                        |      |                |                         |
| 344 | Parapocryptes serperaster            | LC   | Omnivore       | MAR; BRA; DEM           |
|     | Paratrypauchen                       |      |                |                         |
| 345 | Paratrypauchen microcephalus         | LC   | Omnivore       | MAR; BRA; DEM           |
|     | Periophthalmus                       |      |                |                         |
| 346 | Periophthalmus argentilineatus       | LC   | Carnivore      | MAR; FRE; BRA; RFA; AMP |
| 347 | Periophthalmus magnuspinnatus        | NE   | Omnivore       | FRE; DEM                |
| 348 | Periophthalmus modestus              | NE   | Omnivore       | MAR; FRE; BRA; DEM; AMP |
|     | Psammogobius                         |      |                |                         |
| 349 | Psammogobius biocellatus             | LC   | Omnivore       | MAR; FRE; BRA; BEP; AMP |
|     | Pseudapocryptes                      |      |                |                         |
| 350 | Pseudapocryptes elongatus            | LC   | Omnivore       | FRE; BRA; DEM; AMP      |
|     | Pseudogobius                         |      |                |                         |
| 351 | Pseudogobius javanicus               | NE   | Carnivore      | MAR; FRE; BRA; BEP      |
| 352 | Pseudogobius masago                  | NE   | Omnivore       | BRA; DEM                |
| 353 | Pseudogobius taijiangensis           | NE   | Omnivore       | BRA; DEM                |
|     | Rhinogobius                          |      |                |                         |
| 354 | Rhinogobius davidi                   | NE   | Omnivore       | FRE; BEP                |
| 355 | Rhinogobius giurinus                 | LC   | Carnivore      | MAR; FRE; BRA; DEM; AMP |
|     | Sicydium                             |      |                |                         |
| 356 | Sicydium brevifile                   | LC   | Omnivore       | FRE; DEM; AMP           |
|     | Sicyopterus                          |      |                |                         |
| 357 | Sicyopterus japonicus                | NE   | Detrivore      | MAR; FRE; BRA; DEM; AMP |
| 358 | Sicyopterus lagocephalus             | LC   | Herbivore      | MAR; FRE; BRA; DEM; AMP |
| 359 | Sicyopterus pugnans                  | LC   | Omnivore       | FRE; DEM                |
| 360 | Sicyopus zosterophorus               | LC   | Omnivore       | MAR; FRE; BRA; BEP; AMP |
|     | Stiphodon                            |      |                |                         |
| 361 | Stiphodon elegans                    | LC   | Detrivore      | MAR; FRE; BRA; DEM      |
|     | Synechogobius                        |      |                |                         |
| 362 | Synechogobius ommaturus              | NE   | Omnivore       | FRE; BRA; DEM           |
|     | Taenioides                           |      |                |                         |
| 363 | Taenioides anguillaris               | LC   | Omnivore       | MAR; FRE; BRA; DEM      |
| 364 | Taenioides cirratus                  | DD   | Carnivore      | MAR; FRE; BRA; DEM; AMP |
|     | Tridentiger                          |      |                |                         |
| 365 | Tridentiger barbatus                 | NE   | Omnivore       | BRA; DEM                |
| 366 | Tridentiger bifasciatus              | LC   | Omnivore       | MAR; FRE; BRA; DEM; AMP |
| 367 | Tridentiger obscurus                 | NE   | Carnivore      | MAR; FRE; BRA; DEM; AMP |
| 368 | Tridentiger trigonocephalus          | LC   | Omnivore       | MAR; FRE; BRA; DEM      |
|     | Trypauchen                           |      |                |                         |

| No. | Class, Order, Family, Genus, Species | IUCN | Feeding habits | Habitat            |
|-----|--------------------------------------|------|----------------|--------------------|
| 369 | Trypauchen vagina                    | LC   | Carnivore      | MAR; BRA; DEM      |
|     | Wuhanlinigobius                      |      |                |                    |
| 370 | Wuhanlinigobius polylepis            | NE   | Omnivore       | MAR; BRA; DEM      |
|     | Yongeichthys                         |      |                |                    |
| 371 | Yongeichthys criniger                | NE   | Carnivore      | MAR; BRA; DEM      |
|     | Haemulidae                           |      |                |                    |
|     | Diagramma                            |      |                |                    |
| 372 | Diagramma pictum                     | NE   | Omnivore       | MAR; RFA           |
|     | Hapalogenys                          |      |                |                    |
| 373 | Hapalogenys analis                   | NE   | Carnivore      | MAR; BEP           |
| 374 | Hapalogenys nigripinnis              | NE   | Carnivore      | MAR; BRA; BEP      |
|     | Parapristipoma                       |      |                |                    |
| 375 | Parapristipoma trilineatum           | NE   | Carnivore      | MAR; BEP; OD       |
|     | Plectorhinchus                       |      |                |                    |
| 376 | Plectorhinchus cinctus               | NE   | Carnivore      | MAR; RFA           |
|     | Pomadasys                            |      |                |                    |
| 377 | Pomadasys argenteus                  | LC   | Carnivore      | MAR; FRE; BRA; DEM |
| 378 | Pomadasys kaakan                     | NE   | Carnivore      | MAR; BRA; RFA      |
| 379 | Pomadasys maculatus                  | LC   | Carnivore      | MAR; BRA; RFA; AMP |
|     | Kyphosidae                           |      |                |                    |
|     | Kyphosus                             |      |                |                    |
| 380 | Kyphosus vaigiensis                  | LC   | Detrivore      | MAR; RFA           |
|     | Labridae                             |      |                |                    |
|     | Choerodon                            |      |                |                    |
| 381 | Choerodon schoenleinii               | NT   | Carnivore      | MAR; RFA           |
|     | Halichoeres                          |      |                |                    |
| 382 | Halichoeres argus                    | LC   | Omnivore       | MAR; RFA           |
| 383 | Halichoeres nigrescens               | LC   | Omnivore       | MAR; RFA           |
|     | Stethojulis                          |      |                |                    |
| 384 | Stethojulis strigiventer             | LC   | Carnivore      | MAR; RFA           |
| 385 | Stethojulis terina                   | LC   | Carnivore      | MAR; RFA           |
|     | Lactariidae                          |      |                |                    |
|     | Lactarius                            |      |                |                    |
| 386 | Lactarius lactarius                  | NE   | Carnivore      | MAR; BRA; PE       |
|     | Latidae                              |      |                |                    |
|     | Lates                                |      |                |                    |
| 387 | Lates calcarifer*                    | LC   | Carnivore      | MAR; FRE; BRA; DEM |
|     | Psammoperca                          |      |                |                    |
| 388 | Psammoperca waigiensis               | NE   | Carnivore      | MAR; BRA; RFA      |
|     | Leiognathidae                        |      |                |                    |
|     | Deveximentum                         |      |                |                    |
| 389 | Deveximentum insidiator              | NE   | Carnivore      | MAR; BRA; DEM      |
|     | Equulites                            |      |                |                    |
| 390 | Equulites elongatus                  | NE   | Omnivore       | MAR; DEM           |
| 391 | Equulites lineolatus                 | NE   | Carnivore      | MAR; DEM           |
| 392 | Equulites rivulatus                  | NE   | Carnivore      | MAR; DEM           |
|     | Eubleekeria                          |      |                |                    |

Supplementary Material

| No. | Class, Order, Family, Genus, Species | IUCN | Feeding habits | Habitat                 |
|-----|--------------------------------------|------|----------------|-------------------------|
| 393 | Eubleekeria splendens                | LC   | Herbivore      | MAR; BRA; DEM           |
|     | Gazza                                |      |                |                         |
| 394 | Gazza achlamys                       | LC   | Carnivore      | MAR; BRA; RFA           |
| 395 | Gazza minuta                         | LC   | Carnivore      | MAR; BRA; DEM           |
|     | Karalla                              |      |                |                         |
| 396 | Karalla daura                        | NE   | Carnivore      | MAR; DEM                |
| 397 | Karalla dussumieri                   | NE   | Carnivore      | MAR; BRA; DEM           |
|     | Leiognathus                          |      |                |                         |
| 398 | Leiognathus berbis                   | NE   | Carnivore      | MAR; BRA; DEM           |
| 399 | Leiognathus brevis                   | NE   | Carnivore      | MAR; BRA; DEM           |
| 400 | Leiognathus equulus                  | LC   | Carnivore      | MAR; FRE; BRA; DEM; AMP |
| 401 | Leiognathus ruconius                 | NE   | Carnivore      | MAR; FRE; BRA; DEM      |
|     | Nuchequula                           |      |                |                         |
| 402 | Nuchequula nuchalis                  | NE   | Carnivore      | MAR; BRA                |
|     | Photopectoralis                      |      |                |                         |
| 403 | Photopectoralis bindus               | NE   | Herbivore      | MAR; BRA; DEM           |
|     | Lethrinidae                          |      |                |                         |
|     | Lethrinus                            |      |                |                         |
| 404 | Lethrinus haematopterus              | NE   | Omnivore       | MAR; RFA                |
| 405 | Lethrinus harak                      | LC   | Carnivore      | MAR; BRA; RFA           |
| 406 | Lethrinus lentjan                    | LC   | Carnivore      | MAR; BRA; RFA           |
|     | Lutjanidae                           |      |                |                         |
|     | Lutjanus                             |      |                |                         |
| 407 | Lutjanus argentimaculatus            | LC   | Carnivore      | MAR; FRE; BRA; RFA      |
| 408 | Lutjanus fulviflamma                 | LC   | Carnivore      | MAR; BRA; RFA           |
| 409 | Lutjanus fulvus                      | LC   | Carnivore      | MAR; FRE; BRA; RFA      |
| 410 | Lutjanus johnii                      | LC   | Carnivore      | MAR; BRA; RFA           |
| 411 | Lutjanus kasmira                     | LC   | Carnivore      | MAR; RFA                |
| 412 | Lutjanus ophuysenii                  | NE   | Omnivore       | MAR; DEM                |
| 413 | Lutjanus quinquelineatus             | LC   | Carnivore      | MAR; RFA                |
| 414 | Lutjanus russellii                   | LC   | Carnivore      | MAR; BRA; RFA           |
|     | Pristipomoides                       |      |                |                         |
| 415 | Pristipomoides filamentosus          | LC   | Carnivore      | MAR; BEP                |
|     | Malacanthidae                        |      |                |                         |
|     | Branchiostegus                       |      |                |                         |
| 416 | Branchiostegus japonicus             | LC   | Carnivore      | MAR; DEM                |
|     | Malacanthus                          |      |                |                         |
| 417 | Malacanthus latovittatus             | NE   | Carnivore      | MAR; RFA                |
|     | Menidae                              |      |                |                         |
|     | Mene                                 |      |                |                         |
| 418 | Mene maculata                        | NE   | Carnivore      | MAR; BRA; RFA           |
|     | Monodactylidae                       |      |                |                         |
|     | Monodactylus                         |      |                |                         |
| 419 | Monodactylus argenteus*              | LC   | Carnivore      | MAR; FRE; BRA; PE       |
|     | Moronidae                            |      |                |                         |
|     | Lateolabrax                          |      |                |                         |



| No. | Class, Order, Family, Genus, Species | IUCN | Feeding habits | Habitat            |
|-----|--------------------------------------|------|----------------|--------------------|
| 420 | Lateolabrax japonicus                | NE   | Carnivore      | MAR; FRE; BRA; RFA |
|     | Mullidae                             |      |                |                    |
|     | Parupeneus                           |      |                |                    |
| 421 | Parupeneus ciliatus                  | LC   | Carnivore      | MAR; RFA           |
| 422 | Parupeneus forsskali                 | LC   | Carnivore      | MAR; BRA; RFA      |
| 423 | Parupeneus multifasciatus            | LC   | Carnivore      | MAR; RFA           |
|     | Pseudupeneus                         |      |                |                    |
| 424 | Pseudupeneus prayensis               | VU   | Carnivore      | MAR; DEM           |
|     | Upeneus                              |      |                |                    |
| 425 | Upeneus japonicus                    | NE   | Carnivore      | MAR; RFA           |
| 426 | Upeneus quadrilineatus               | NE   | Omnivore       | MAR; DEM           |
| 427 | Upeneus sulphureus                   | LC   | Carnivore      | MAR; BRA; DEM; OD  |
| 428 | Upeneus tragula                      | LC   | Carnivore      | MAR; BRA; RFA; OD  |
|     | Nemipteridae                         |      |                |                    |
|     | Nemipterus                           |      |                |                    |
| 429 | Nemipterus peronii                   | LC   | Carnivore      | MAR; BRA; DEM      |
| 430 | Nemipterus virgatus                  | VU   | Carnivore      | MAR; DEM           |
|     | Parascolopsis                        |      |                |                    |
| 431 | Parascolopsis inermis                | LC   | Carnivore      | MAR; DEM           |
|     | Pentapodus                           |      |                |                    |
| 432 | Pentapodus setosus                   | NE   | Carnivore      | MAR; RFA           |
|     | Scolopsis                            |      |                |                    |
| 433 | Scolopsis monogramma                 | LC   | Carnivore      | MAR; RFA           |
| 434 | Scolopsis taeniopterus               | NE   | Carnivore      | MAR; DEM           |
| 435 | Scolopsis vosmeri                    | LC   | Carnivore      | MAR; RFA           |
|     | Osphronemidae                        |      |                |                    |
|     | Macropodus                           |      |                |                    |
| 436 | Macropodus opercularis               | LC   | Carnivore      | FRE; BRA; PEL      |
|     | Pempheridae                          |      |                |                    |
|     | Pempheris                            |      |                |                    |
| 437 | Pempheris oualensis                  | NE   | Carnivore      | MAR; RFA           |
|     | Periophthalmidae                     |      |                |                    |
|     | Boleophthalmus                       |      |                |                    |
| 438 | Boleophthalmus pectinirostris        | NE   | Detrivore      | MAR; FRE; BRA; DEM |
|     | Scartelaos                           |      |                |                    |
| 439 | Scartelaos gigas                     | NE   | Omnivore       | MAR; DEM           |
| 440 | Scartelaos histophorus               | LC   | Omnivore       | MAR; BRA; DEM      |
|     | Pinguipedidae                        |      |                |                    |
|     | Parapercis                           |      |                |                    |
| 441 | Parapercis ommatura                  | NE   | Omnivore       | MAR; DEM           |
| 442 | Parapercis sexfasciata               | NE   | Omnivore       | MAR; DEM           |
|     | Pomacentridae                        |      |                |                    |
|     | Abudefduf                            |      |                |                    |
| 443 | Abudefduf sordidus                   | LC   | Herbivore      | MAR; BRA; RFA      |
| 444 | Abudefduf vaigiensis                 | LC   | Herbivore      | MAR; RFA; OD       |
|     | Neoglyphidodon                       |      |                |                    |
| 445 | Neoglyphidodon melas                 | NE   | Carnivore      | MAR; RFA           |

| No. | Class, Order, Family, Genus, Species                     | IUCN | Feeding habits | Habitat                 |
|-----|----------------------------------------------------------|------|----------------|-------------------------|
| 446 | Stegastes<br>Stegastes fasciolatus                       | NE   | Detrivore      | MAR; RFA                |
| 447 | Priacanthidae<br>Priacanthus<br>Priacanthus macracanthus | LC   | Carnivore      | MAR; RFA                |
| 448 | Ptereleotridae<br>Parioglossus<br>Parioglossus dotui     | NE   | Omnivore       | MAR; BRA; BEP           |
| 449 | Rachycentridae<br>Rachycentron<br>Rachycentron canadum   | LC   | Carnivore      | MAR; BRA; RFA           |
| 450 | Rhyacichthyidae<br>Rhyacichthys<br>Rhyacichthys aspro    | DD   | Omnivore       | MAR; FRE; BRA; DEM; AMP |
| 451 | Scaridae<br>Leptoscarus<br>Leptoscarus vaigiensis        | LC   | Detrivore      | MAR; RFA                |
| 452 | Scarus<br>Scarus ghobban                                 | LC   | Detrivore      | MAR; BRA; RFA           |
| 453 | Scatophagidae<br>Scatophagus<br>Scatophagus argus        | LC   | Herbivore      | MAR; FRE; BRA; RFA      |
| 454 | Selenotoca<br>Selenotoca multifasciata                   | LC   | Omnivore       | MAR; FRE; BRA; BEP; AMP |
| 455 | Sciaenidae<br>Chrysochir<br>Chrysochir aureus            | LC   | Carnivore      | MAR; BRA; BEP           |
| 456 | Collichthys<br>Collichthys lucidus                       | LC   | Carnivore      | MAR; DEM; OD            |
| 457 | Dendrophysa<br>Dendrophysa russelii                      | LC   | Omnivore       | MAR; FRE; BRA; DEM; AMP |
| 458 | Johnius<br>Johnius belangerii                            | LC   | Carnivore      | MAR; BRA; DEM; AMP      |
| 459 | Johnius distinctus                                       | LC   | Omnivore       | MAR; BEP                |
| 460 | Johnius fasciatus                                        | NE   | Omnivore       | FRE; BRA; DEM           |
| 461 | Larimichthys<br>Larimichthys crocea                      | CR   | Carnivore      | MAR; BRA; BEP; OD       |
| 462 | Larimichthys polyactis                                   | LC   | Carnivore      | MAR; BEP; OD            |
| 463 | Macrospinoso<br>Macrospinoso cuja                        | DD   | Omnivore       | MAR; FRE; BRA           |
| 464 | Nibea<br>Nibea albiflora                                 | LC   | Carnivore      | MAR; BEP                |
| 465 | Nibea coibor                                             | DD   | Omnivore       | MAR; BRA; DEM           |
| 466 | Otolithes<br>Otolithes ruber                             | LC   | Carnivore      | MAR; BRA; BEP; AMP      |
|     | Pennahia                                                 |      |                |                         |

| No. | Class, Order, Family, Genus, Species | IUCN | Feeding habits | Habitat            |
|-----|--------------------------------------|------|----------------|--------------------|
| 467 | Pennahia anea                        | LC   | Carnivore      | MAR; DEM           |
| 468 | Pennahia argentata                   | LC   | Carnivore      | MAR; BEP; OD       |
| 469 | Pennahia macrocephalus               | LC   | Carnivore      | MAR; DEM           |
| 470 | Pennahia pawak                       | LC   | Carnivore      | MAR; BEP           |
|     | Protonibea                           |      |                |                    |
| 471 | Protonibea diacanthus                | NT   | Carnivore      | MAR; BRA; DEM      |
|     | Sciaenops                            |      |                |                    |
| 472 | Sciaenops ocellatus*                 | LC   | Carnivore      | MAR; BRA; DEM; OD  |
|     | Scombridae                           |      |                |                    |
|     | Euthynnus                            |      |                |                    |
| 473 | Euthynnus affinis                    | LC   | Carnivore      | MAR; PE; OD        |
|     | Rastrelliger                         |      |                |                    |
| 474 | Rastrelliger kanagurta               | DD   | Carnivore      | MAR; PE; OD        |
|     | Scomber                              |      |                |                    |
| 475 | Scomber australasicus                | LC   | Carnivore      | MAR; PE; OD        |
| 476 | Scomber japonicus                    | LC   | Carnivore      | MAR; PE; OD        |
|     | Scomberomorus                        |      |                |                    |
| 477 | Scomberomorus niphonius              | DD   | Carnivore      | MAR; PE; OD        |
|     | Serranidae                           |      |                |                    |
|     | Epinephelus                          |      |                |                    |
| 478 | Epinephelus akaara                   | EN   | Carnivore      | MAR; RFA           |
| 479 | Epinephelus bleekeri                 | DD   | Omnivore       | MAR; DEM           |
| 480 | Epinephelus coioides                 | LC   | Carnivore      | MAR; BRA; RFA      |
| 481 | Epinephelus fasciatus                | LC   | Carnivore      | MAR; RFA           |
| 482 | Epinephelus lanceolatus              | DD   | Carnivore      | MAR; BRA; RFA      |
| 483 | Epinephelus malabaricus              | LC   | Carnivore      | MAR; BRA; RFA; AMP |
| 484 | Epinephelus quoyanus                 | LC   | Carnivore      | MAR; RFA           |
| 485 | Epinephelus sexfasciatus             | LC   | Carnivore      | MAR; RFA           |
| 486 | Epinephelus trimaculatus             | LC   | Carnivore      | MAR; RFA           |
|     | Grammistes                           |      |                |                    |
| 487 | Grammistes sexlineatus               | LC   | Carnivore      | MAR; RFA           |
|     | Plectranthias                        |      |                |                    |
| 488 | Plectranthias japonicus              | NE   | Carnivore      | MAR; DEM           |
|     | Siganidae                            |      |                |                    |
|     | Siganus                              |      |                |                    |
| 489 | Siganus argenteus                    | LC   | Detritivore    | MAR; RFA           |
| 490 | Siganus canaliculatus                | LC   | Detritivore    | MAR; BRA; RFA      |
| 491 | Siganus fuscescens                   | LC   | Detritivore    | MAR; BRA; RFA      |
| 492 | Siganus guttatus                     | LC   | Detritivore    | MAR; BRA; RFA      |
|     | Sillaginidae                         |      |                |                    |
|     | Sillago                              |      |                |                    |
| 493 | Sillago aeolus                       | NE   | Omnivore       | MAR; DEM           |
| 494 | Sillago asiatica                     | NE   | Omnivore       | MAR; DEM           |
| 495 | Sillago japonica                     | LC   | Carnivore      | MAR; DEM           |
| 496 | Sillago maculata                     | NE   | Carnivore      | MAR; BRA; DEM      |
| 497 | Sillago sihama                       | LC   | Carnivore      | MAR; BRA; RFA; AMP |
|     | Sparidae                             |      |                |                    |

| No. | Class, Order, Family, Genus, Species | IUCN | Feeding habits | Habitat            |
|-----|--------------------------------------|------|----------------|--------------------|
|     | Acanthopagrus                        |      |                |                    |
| 498 | Acanthopagrus berda                  | LC   | Carnivore      | MAR; FRE; BRA; DEM |
| 499 | Acanthopagrus chinshira              | NT   | Omnivore       | MAR; PE            |
| 500 | Acanthopagrus latus                  | DD   | Carnivore      | MAR; FRE; BRA; DEM |
| 501 | Acanthopagrus schlegelii             | LC   | Carnivore      | MAR; BRA; DEM      |
|     | Dentex                               |      |                |                    |
| 502 | Dentex hypselosomus                  | LC   | Carnivore      | MAR; DEM           |
|     | Pagrus                               |      |                |                    |
| 503 | Pagrus major                         | LC   | Carnivore      | MAR; DEM           |
|     | Parargyrops                          |      |                |                    |
| 504 | Parargyrops edita                    | NE   | Omnivore       |                    |
|     | Rhabdosargus                         |      |                |                    |
| 505 | Rhabdosargus sarba                   | LC   | Carnivore      | MAR; BRA; RFA      |
|     | Sparus                               |      |                |                    |
| 506 | Sparus aurata*                       | LC   | Carnivore      | MAR; BRA; DEM      |
|     | Sphyraenidae                         |      |                |                    |
|     | Sphyraena                            |      |                |                    |
| 507 | Sphyraena barracuda                  | LC   | Carnivore      | MAR; BRA; RFA      |
| 508 | Sphyraena flavicauda                 | NE   | Carnivore      | MAR; RFA           |
| 509 | Sphyraena jello                      | NE   | Carnivore      | MAR; BRA; RFA      |
| 510 | Sphyraena qenie                      | NE   | Carnivore      | MAR; RFA           |
|     | Stromateidae                         |      |                |                    |
|     | Pampus                               |      |                |                    |
| 511 | Pampus argenteus*                    | NE   | Carnivore      | MAR; BEP           |
| 512 | Pampus chinensis                     | NE   | Carnivore      | MAR; BRA           |
| 513 | Pampus cinereus                      | NE   | Carnivore      | MAR; BEP           |
| 514 | Pampus nozawae                       | NE   | Carnivore      |                    |
|     | Terapontidae                         |      |                |                    |
|     | Helotes                              |      |                |                    |
| 515 | Helotes sexlineatus                  | LC   | Detrivore      | MAR; BRA; BEP      |
|     | Pelates                              |      |                |                    |
| 516 | Pelates quadrilineatus               | NE   | Carnivore      | MAR; BRA; RFA      |
|     | Rhynchopelates                       |      |                |                    |
| 517 | Rhynchopelates oxyrhynchus           | NE   | Carnivore      | MAR; FRE; BRA; BEP |
|     | Terapon                              |      |                |                    |
| 518 | Terapon jarbua                       | LC   | Carnivore      | MAR; FRE; BRA; DEM |
| 519 | Terapon theraps                      | LC   | Carnivore      | MAR; FRE; BRA; RFA |
|     | Trichiuridae                         |      |                |                    |
|     | Eupleurogrammus                      |      |                |                    |
| 520 | Eupleurogrammus muticus              | NE   | Carnivore      | MAR; BRA; BEP      |
|     | Lepturacanthus                       |      |                |                    |
| 521 | Lepturacanthus savala                | NE   | Carnivore      | MAR; BRA; BEP      |
|     | Trichiurus                           |      |                |                    |
| 522 | Trichiurus lepturus                  | LC   | Carnivore      | MAR; BRA; BEP      |
|     | Pleuronectiformes                    |      |                |                    |
|     | Bothidae                             |      |                |                    |

| No. | Class, Order, Family, Genus, Species | IUCN | Feeding habits | Habitat            |
|-----|--------------------------------------|------|----------------|--------------------|
|     | Arnoglossus                          |      |                |                    |
| 523 | Arnoglossus tenuis                   | LC   | Carnivore      | MAR; DEM           |
|     | Psettina                             |      |                |                    |
| 524 | Psettina iijimae                     | LC   | Carnivore      | MAR; DEM           |
|     | Cynoglossidae                        |      |                |                    |
|     | Cynoglossus                          |      |                |                    |
| 525 | Cynoglossus abbreviatus              | NE   | Carnivore      | MAR; DEM           |
| 526 | Cynoglossus arel                     | DD   | Carnivore      | MAR; BRA; DEM      |
| 527 | Cynoglossus bilineatus               | NE   | Carnivore      | MAR; BRA; DEM      |
| 528 | Cynoglossus itinus                   | NE   | Omnivore       | MAR; DEM           |
| 529 | Cynoglossus joyneri                  | NE   | Carnivore      | MAR; DEM           |
| 530 | Cynoglossus puncticeps               | LC   | Carnivore      | MAR; FRE; BRA; DEM |
| 531 | Cynoglossus robustus                 | NE   | Omnivore       | MAR; DEM           |
| 532 | Cynoglossus semilaevis               | NE   | Carnivore      | MAR; FRE; BRA; DEM |
| 533 | Cynoglossus sinicus                  | NE   | Omnivore       | FRE; BRA; DEM      |
| 534 | Cynoglossus trigrammus               | LC   | Omnivore       | FRE; BRA; DEM      |
|     | Paraplagusia                         |      |                |                    |
| 535 | Paraplagusia bilineata               | NE   | Omnivore       | MAR; BRA; DEM      |
| 536 | Paraplagusia blochii                 | NE   | Omnivore       | MAR; BRA; DEM      |
|     | Paralichthyidae                      |      |                |                    |
|     | Paralichthys                         |      |                |                    |
| 537 | Paralichthys olivaceus               | NE   | Carnivore      | MAR; DEM           |
|     | Pseudorhombus                        |      |                |                    |
| 538 | Pseudorhombus arsius                 | NE   | Carnivore      | MAR; BRA; DEM      |
| 539 | Pseudorhombus cinnamoneus            | LC   | Carnivore      | MAR; DEM           |
| 540 | Pseudorhombus dupliciocellatus       | NE   | Carnivore      | MAR; DEM           |
| 541 | Pseudorhombus elevatus               | NE   | Carnivore      | MAR; DEM           |
| 542 | Pseudorhombus levisquamis            | LC   | Omnivore       | MAR; DEM           |
| 543 | Pseudorhombus malayanus              | NE   | Carnivore      | MAR; DEM           |
| 544 | Pseudorhombus oligodon               | LC   | Carnivore      | MAR; DEM           |
|     | Pleuronectidae                       |      |                |                    |
|     | Eopsetta                             |      |                |                    |
| 545 | Eopsetta grigorjewi                  | NE   | Omnivore       | MAR; DEM           |
|     | Pleuronichthys                       |      |                |                    |
| 546 | Pleuronichthys cornutus              | NE   | Omnivore       | MAR; DEM           |
|     | Samaris                              |      |                |                    |
| 547 | Samaris cristatus                    | LC   | Carnivore      | MAR; BRA; DEM      |
|     | Psettodidae                          |      |                |                    |
|     | Psettodes                            |      |                |                    |
| 548 | Psettodes erumei                     | DD   | Carnivore      | MAR; DEM           |
|     | Samaridae                            |      |                |                    |
|     | Plagiopsetta                         |      |                |                    |
| 549 | Plagiopsetta glossa                  | LC   | Carnivore      | MAR; DEM           |
|     | Soleidae                             |      |                |                    |
|     | Aseraggodes                          |      |                |                    |
| 550 | Aseraggodes orientalis               | DD   | Omnivore       | MAR; RFA           |
|     | Brachirus                            |      |                |                    |

Supplementary Material

| No. | Class, Order, Family, Genus, Species | IUCN | Feeding habits | Habitat            |
|-----|--------------------------------------|------|----------------|--------------------|
| 551 | Brachirus orientalis                 | LC   | Carnivore      | MAR; FRE; BRA; DEM |
| 552 | Brachirus pan                        | LC   | Omnivore       | MAR; FRE; BRA; DEM |
|     | Pardachirus                          |      |                |                    |
| 553 | Pardachirus pavoninus                | LC   | Carnivore      | MAR; RFA           |
|     | Solea                                |      |                |                    |
| 554 | Solea ovata                          | LC   | Carnivore      | MAR; DEM           |
|     | Zebrias                              |      |                |                    |
| 555 | Zebrias quagga                       | LC   | Carnivore      | MAR; DEM           |
| 556 | Zebrias zebra                        | NE   | Carnivore      | MAR; BRA; RFA      |
|     | Scorpaeniformes                      |      |                |                    |
|     | Aploactinidae                        |      |                |                    |
|     | Acanthosphex                         |      |                |                    |
| 557 | Acanthosphex leurynnis               | LC   | Omnivore       | MAR; DEM           |
|     | Hypodytes                            |      |                |                    |
| 558 | Hypodytes indicus                    | NE   | Omnivore       |                    |
|     | Bembridae                            |      |                |                    |
|     | Bembras                              |      |                |                    |
| 559 | Bembras japonica                     | NE   | Omnivore       | MAR; DEM           |
|     | Platycephalidae                      |      |                |                    |
|     | Cociella                             |      |                |                    |
| 560 | Cociella crocodila                   | LC   | Carnivore      | MAR; BRA; RFA      |
|     | Grammoplites                         |      |                |                    |
| 561 | Grammoplites scaber                  | NE   | Omnivore       | MAR; BRA; DEM; AMP |
|     | Inegocia                             |      |                |                    |
| 562 | Inegocia japonica                    | LC   | Carnivore      | MAR; DEM           |
|     | Onigocia                             |      |                |                    |
| 563 | Onigocia macrolepis                  | LC   | Carnivore      | MAR; DEM           |
|     | Platycephalus                        |      |                |                    |
| 564 | Platycephalus indicus                | DD   | Carnivore      | MAR; BRA; RFA; OD  |
|     | Scorpaenidae                         |      |                |                    |
|     | Inimicus                             |      |                |                    |
| 565 | Inimicus japonicus                   | NE   | Carnivore      | MAR; DEM           |
|     | Minous                               |      |                |                    |
| 566 | Minous monodactylus                  | LC   | Omnivore       | MAR; DEM           |
| 567 | Minous trachycephalus                | NE   | Omnivore       | MAR; DEM           |
|     | Paracentropogon                      |      |                |                    |
| 568 | Paracentropogon longispinis          | LC   | Omnivore       | MAR; DEM           |
|     | Scorpaenopsis                        |      |                |                    |
| 569 | Scorpaenopsis neglecta               | LC   | Omnivore       | MAR; DEM           |
|     | Sebastiscus                          |      |                |                    |
| 570 | Sebastiscus albofasciatus            | NE   | Omnivore       | MAR; DEM           |
| 571 | Sebastiscus marmoratus               | NE   | Omnivore       | MAR; DEM; OD       |
|     | Tetraroge                            |      |                |                    |
| 572 | Tetraroge barbata                    | NE   | Carnivore      | MAR; FRE; BRA; RFA |
|     | Trachicephalus                       |      |                |                    |
| 573 | Trachicephalus uranoscopus           | NE   | Omnivore       | MAR; BRA; DEM      |

| No. | Class, Order, Family, Genus, Species | IUCN | Feeding habits | Habitat                 |
|-----|--------------------------------------|------|----------------|-------------------------|
|     | Vespacula                            |      |                |                         |
| 574 | Vespacula trachinoides               | NE   | Omnivore       | MAR; BRA; DEM           |
|     | Triglidae                            |      |                |                         |
|     | Chelidonichthys                      |      |                |                         |
| 575 | Chelidonichthys kumu                 | LC   | Carnivore      | MAR; BRA; DEM           |
|     | Lepidotrigla                         |      |                |                         |
| 576 | Lepidotrigla oglina                  | NE   | Omnivore       | MAR; BAD                |
|     | Siluriformes                         |      |                |                         |
|     | Ariidae                              |      |                |                         |
|     | Arius                                |      |                |                         |
| 577 | Arius arius                          | LC   | Carnivore      | MAR; BRA; DEM; AMP      |
| 578 | Arius maculatus                      | NE   | Carnivore      | MAR; FRE; BRA; DEM; POT |
|     | Netuma                               |      |                |                         |
| 579 | Netuma thalassina                    | NE   | Carnivore      | MAR; FRE; BRA; DEM; AMP |
|     | Plicofollis                          |      |                |                         |
| 580 | Plicofollis nella                    | NE   | Omnivore       | MAR; BRA; DEM           |
|     | Bagridae                             |      |                |                         |
|     | Tachysurus                           |      |                |                         |
| 581 | Tachysurus sinensis                  | NE   | Carnivore      | FRE; BRA; DEM           |
|     | Clariidae                            |      |                |                         |
|     | Clarias                              |      |                |                         |
| 582 | Clarias fuscus                       | LC   | Carnivore      | FRE; DEM                |
|     | Loricariidae                         |      |                |                         |
|     | Hypostomus                           |      |                |                         |
| 583 | Hypostomus Plecostomus*              | NE   | Herbivore      | FRE; DEM                |
|     | Plotosidae                           |      |                |                         |
|     | Plotosus                             |      |                |                         |
| 584 | Plotosus lineatus                    | NE   | Carnivore      | MAR; BRA; RFA; AMP      |
|     | Siluridae                            |      |                |                         |
|     | Silurus                              |      |                |                         |
| 585 | Silurus asotus                       | LC   | Carnivore      | FRE; DEM                |
|     | Stomiiformes                         |      |                |                         |
|     | Phosichthyidae                       |      |                |                         |
|     | Vinciguerria                         |      |                |                         |
| 586 | Vinciguerria nimbaria                | LC   | Carnivore      | MAR; BAP                |
|     | Synbranchiformes                     |      |                |                         |
|     | Synbranchidae                        |      |                |                         |
|     | Monopterus                           |      |                |                         |
| 587 | Monopterus albus                     | LC   | Carnivore      | FRE; BRA; DEM           |
|     | Tetraodontiformes                    |      |                |                         |
|     | Monacanthidae                        |      |                |                         |
|     | Aluterus                             |      |                |                         |
| 588 | Aluterus monoceros                   | LC   | Carnivore      | MAR; RFA                |
|     | Monacanthus                          |      |                |                         |
| 589 | Monacanthus chinensis                | LC   | Herbivore      | MAR; RFA                |
|     | Paramonacanthus                      |      |                |                         |
| 590 | Paramonacanthus sulcatus             | LC   | Omnivore       | MAR; BEP                |

| No. | Class, Order, Family, Genus, Species | IUCN | Feeding habits | Habitat                 |
|-----|--------------------------------------|------|----------------|-------------------------|
|     | Pseudomonacanthus                    |      |                |                         |
| 591 | Pseudomonacanthus peroni             | LC   | Omnivore       | MAR; RFA                |
|     | Thamnaconus                          |      |                |                         |
| 592 | Thamnaconus septentrionalis          | LC   | Omnivore       | MAR; DEM                |
| 593 | Thamnaconus tessellatus              | LC   | Omnivore       | MAR; BAD                |
|     | Ostraciontidae                       |      |                |                         |
|     | Ostracion                            |      |                |                         |
| 594 | Ostracion immaculatus                | NE   | Omnivore       | MAR; DEM                |
|     | Tetraodontidae                       |      |                |                         |
|     | Amblyrhynchotes                      |      |                |                         |
| 595 | Amblyrhynchotes honckenii            | LC   | Omnivore       |                         |
|     | Arothron                             |      |                |                         |
| 596 | Arothron hispidus                    | LC   | Herbivore      | MAR; BRA; RFA           |
| 597 | Arothron immaculatus                 | LC   | Herbivore      | MAR; BRA; RFA           |
|     | Chelonodon                           |      |                |                         |
| 598 | Chelonodon patoca                    | LC   | Carnivore      | MAR; FRE; BRA; RFA; ANA |
|     | Lagocephalus                         |      |                |                         |
| 599 | Lagocephalus inermis                 | LC   | Omnivore       | MAR; DEM                |
| 600 | Lagocephalus lunaris                 | LC   | Omnivore       | MAR; BRA; DEM; OD       |
| 601 | Lagocephalus spadiceus               | LC   | Omnivore       | MAR; BRA; DEM; OD       |
|     | Takifugu                             |      |                |                         |
| 602 | Takifugu alboplumbeus                | LC   | Omnivore       | MAR; DEM                |
| 603 | Takifugu basilevskianus              | DD   | Omnivore       | MAR; RFA                |
| 604 | Takifugu bimaculatus                 | LC   | Omnivore       | MAR; DEM                |
| 605 | Takifugu niphobles                   | LC   | Carnivore      | MAR; DEM                |
| 606 | Takifugu oblongus                    | LC   | Carnivore      | MAR; BRA; DEM           |
| 607 | Takifugu ocellatus                   | NT   | Omnivore       | MAR; FRE; BRA; DEM; ANA |
| 608 | Takifugu porphyreus                  | LC   | Omnivore       | MAR; DEM                |
| 609 | Takifugu xanthopterus                | LC   | Carnivore      | MAR; DEM                |
|     | Triacanthidae                        |      |                |                         |
|     | Triacanthus                          |      |                |                         |
| 610 | Triacanthus biaculeatus              | NE   | Carnivore      | MAR; BRA; DEM           |
| 611 | Triacanthus nieuhofii                | NE   | Carnivore      | MAR; DEM                |

Note: The Habitats are indicated as: Brackish (BRA); reef-associated (RFA); oceanodromous (OD); amphidromous (AMP); anadromous (ANA); pelagic-neritic (PE); bathypelagic (BAP); benthopelagic (BEP); pelagic-oceanic (PELO); pelagic (PEL); demersal (DEM); bathydemersal (BAD); Marine (MAR); freshwater (FRE); potamodromous (POT). The IUCN status are indicated as: Critically Endangered (CR); Endangered (EN); Vulnerable (VU); Near Threatened (NT); Least Concern (LC); Data Deficient (DD); Not Evaluated (NE). \*: Non-native species.
